# Supplementary material
Source: PubMed Central journal article supplement (PMC4103333)
Supplement: 1402352111_pnas.201402352SI.pdf [file 1402352111_pnas.201402352SI.pdf]

# Supporting Information

Grahammer et al. 10.1073/pnas.1402352111



**Fig. S1.** Use of kidney-cell culture to assess developmental abnormalities in tubulogenesis. (A and B) Kidney explants from embryonic day (E) 12.5 embryos from *Raptor fl/fl; KspCre* and *Raptor fl/fl* animals were assessed for branching and elongation defects up to E17.5. As evident from the differential interference contrast (A) and immunofluorescence (B) images, neither tubular elongation nor tubular branching differed in the two genotypes. (C and C') Acid fuchsin-orange G (SFOG) staining shows increased fibrous tissue content in *Raptor fl/fl; KspCre* mice compared with wild-type animals. (C'' and C''') Similarly, silver staining shows that basement membranes are thickened around thick ascending limb of Henle (TAL) tissue from knockout mice as compared with TAL tissue from wild-type mice. (Scale bars: C and C', 200 μm; C'' and C''', 20 μm.)





**Fig. 54.** Expression of total S6 protein (S6P) in mouse renal tubules. (*A–D'*) Total S6P (red) is ubiquitously expressed along the renal tubule, as shown with the segment-specific markers (all in green): (*A–A'*) Lotus tetragonobulus (LTG), proximal tubule; (*B–B'*) Tamm–Horsfall protein (THP), TAL; (*C–C'*) Calbindin-D28K, distal tubule; and (*D–D'*) aquaporin 2, collecting duct. (*E–E'*) Control staining omitting the total S6P primary antibody. Although the exposure time was extended to 20 s, no specific signal of the secondary donkey anti-rabbit 555 antibody can be detected. (Scale bars: *A–A'*, *C–C'*, and *D–D'*, 20  $\mu\text{m}$ ; *B–B'* and *E–E'*, 50  $\mu\text{m}$ .)



**Fig. S5.** Expression of phosphorylated S6P (P-S6P) in mouse renal tubules. P-S6P (red) is expressed only very slightly in proximal tubules (A–A'') but is strongly expressed in the TAL (B–B''). Again, there is a very weak expression in DCT/connecting tubule (C–C'') and virtually no expression in collecting ducts (D–D''). This expression is consistent with the major TAL phenotype of *Raptor fl/fl<sup>+</sup>KspCre* mice. Segment-specific markers (all in green) are (A–A'') LTG, proximal tubule; (B–B'') THP, TAL; (C–C'') Calbindin-D28K, distal tubule; and (D–D'') Aquaporin 2, collecting duct. (Scale bars: 50  $\mu\text{m}$ .)

**Table S1. Physiological parameters of *Raptor fl/fl*\**KspCre* animals under basal conditions and after diuretic treatment**

|                                   | Control                | Thirst challenge          | Vehicle               | Furosemide            | Thiazide               | Triamterene           |
|-----------------------------------|------------------------|---------------------------|-----------------------|-----------------------|------------------------|-----------------------|
| WT $\Delta$ bw, g (9 or 10)       | N.a.                   | $-1.1 \pm 0.2$            | $-0.6 \pm 0.0$        | $-2.0 \pm 0.1$        | $-0.7 \pm 0.1$         | $-1.1 \pm 0.1$        |
| KO $\Delta$ bw, g (8)             | N.a.                   | $-3.7 \pm 0.4^{***}$      | $-1.1 \pm 0.2^*$      | $-2.2 \pm 0.3$        | $-1.42 \pm 0.1^{***}$  | $-1.7 \pm 0.3$        |
| WT food, g (10)                   | $4.1 \pm 0.2$          |                           |                       |                       |                        |                       |
| KO food, g (9)                    | $3.8 \pm 0.1$          |                           |                       |                       |                        |                       |
| WT drink, mL (10)                 | $3.9 \pm 0.1$          |                           |                       |                       |                        |                       |
| KO drink, mL (9)                  | $14.3 \pm 1.1^{***}$   |                           |                       |                       |                        |                       |
| WT urine flow, $\mu$ L/h (10)     | $64.2 \pm 7.8$         | $3.8 \pm 1.9$             | $56.8 \pm 7.5$        | $369.8 \pm 43.0$      | $73.7 \pm 11.8$        | $48.0 \pm 9.0$        |
| KO urine flow, $\mu$ L/h (9)      | $832.6 \pm 96.3^{***}$ | $176.9 \pm 21.9^{***}$    | $115.5 \pm 19.6^{**}$ | $415.3 \pm 56.5$      | $212.5 \pm 23.1^{***}$ | $144.8 \pm 30.7^{**}$ |
| WT urea, mM (10)                  | $9.2 \pm 1.2$          |                           |                       |                       |                        |                       |
| KO urea, mM (8)                   | $14.1 \pm 1.2^{**}$    |                           |                       |                       |                        |                       |
| WT serum Na, mM (10)              | $153.4 \pm 1.4$        |                           |                       |                       |                        |                       |
| KO serum Na, mM (8)               | $154.0 \pm 0.8$        |                           |                       |                       |                        |                       |
| WT serum K, mM (10)               | $4.2 \pm 0.1$          |                           |                       |                       |                        |                       |
| KO serum K, mM (8)                | $4.1 \pm 0.1$          |                           |                       |                       |                        |                       |
| WT serum Ca, mM (10)              | $2.3 \pm 0.0$          |                           |                       |                       |                        |                       |
| KO serum Ca, mM (8)               | $2.3 \pm 0.0$          |                           |                       |                       |                        |                       |
| WT serum Mg, mM (10)              | $0.6 \pm 0.0$          |                           |                       |                       |                        |                       |
| KO serum Mg, mM (8)               | $0.7 \pm 0.0$          |                           |                       |                       |                        |                       |
| WT urine ADH, pmol/24 h (9)       | $0.7 \pm 0.1$          |                           |                       |                       |                        |                       |
| KO urine ADH, pmol/24 h (9)       | $0.9 \pm 0.2$          |                           |                       |                       |                        |                       |
| WT plasma osmolality, mOsm/kg (9) | $306.4 \pm 2.2$        |                           |                       |                       |                        |                       |
| KO plasma osmolality, mOsm/kg (7) | $316.3 \pm 3.3^*$      |                           |                       |                       |                        |                       |
| WT urine osmolality, mOsm/kg (10) | $2,785.5 \pm 252.2$    | Per 6 h in metabolic cage | $616.4 \pm 77.6$      | $51.0 \pm 2.2$        | $704.2 \pm 111.9$      | $419.0 \pm 70.3$      |
| KO urine osmolality, mOsm/kg (9)  | $540.7 \pm 46.7^{***}$ |                           | $224.4 \pm 39.3$      | $275.5 \pm 54.9$      | $255.2 \pm 33.9$       | $287.1 \pm 48.8$      |
| WT urine Na, $\mu$ mol/24 h (10)  | $370.6 \pm 15.7$       | Per 6 h in metabolic cage | $7.7 \pm 1.6$         | $192.5 \pm 20.8$      | $28.1 \pm 7.28$        | $12.3 \pm 2.9$        |
| KO urine Na, $\mu$ mol/24 h (9)   | $326.0 \pm 19.4$       |                           | $6.5 \pm 1.9$         | $99.8 \pm 18.7^{***}$ | $44.6 \pm 8.2$         | $16.1 \pm 4.3$        |
| WT urine K, $\mu$ mol/24 h (10)   | $594.0 \pm 26.2$       | Per 6 h in metabolic cage | $20.1 \pm 4.4$        | $89.6 \pm 12.8$       | $25.7 \pm 6.9$         | $10.0 \pm 2.0$        |
| KO urine, $\mu$ mol/24 h K (9)    | $521.3 \pm 26.7$       |                           | $13.8 \pm 3.6$        | $34.4 \pm 5.6^{***}$  | $39.9 \pm 6.6$         | $19.2 \pm 6.1$        |
| WT urine Ca, $\mu$ mol/24 h (10)  | $2.0 \pm 0.1$          | Per 6 h in metabolic cage | $0.5 \pm 0.1$         | $1.8 \pm 0.2$         | $0.7 \pm 0.1$          | $0.7 \pm 0.1$         |
| KO urine Ca, $\mu$ mol/24 h (8)   | $6.0 \pm 1.1^{***}$    |                           | $1.1 \pm 0.2^{**}$    | $1.5 \pm 0.1$         | $1.8 \pm 0.3^{**}$     | $1.9 \pm 0.4^{**}$    |
| WT urine Mg, $\mu$ mol/24 h (10)  | $11.0 \pm 0.7$         |                           |                       |                       |                        |                       |
| KO urine Mg, $\mu$ mol/24 h (8)   | $16.1 \pm 1.1^{***}$   |                           |                       |                       |                        |                       |

Number of mice is stated in parentheses. Asterisks indicate statistical significance (\* $P < 0.05$ , \*\* $P < 0.01$ , \*\*\* $P < 0.001$  knockout vs. wild type). bw, body weight; N.a., not applicable.

**Table S2. Physiological parameters of *Raptor fl/fl*\**Rictor fl/fl*\**KspCre* animals**

|                                                                          | Control       |
|--------------------------------------------------------------------------|---------------|
| WT bw, g (24)                                                            | 24.1 ± 0.8.   |
| KO bw, g (12)                                                            | 20.69 ± 1.4*  |
| WT deaths until week 12                                                  | 0/24          |
| KO deaths until week 12                                                  | 2/14          |
| WT urine flow, $\mu\text{L}\cdot\text{h}^{-1}\cdot\text{g}^{-1}$ bw (24) | 8.5 ± 0.7     |
| KO urine flow $\mu\text{L}\cdot\text{h}^{-1}\cdot\text{g}^{-1}$ bw (12)  | 19.1 ± 3.1**  |
| WT urea, mM (23)                                                         | 9.4 ± 0.6     |
| KO urea, mM (12)                                                         | 18.3 ± 1.5*** |
| WT serum Na, mM (23)                                                     | 147.8 ± 1.4   |
| KO serum Na, mM (12)                                                     | 147.1 ± 0.8   |
| WT serum K, mM (23)                                                      | 5.4 ± 0.1     |
| KO serum K, mM (12)                                                      | 5.0 ± 0.2     |
| WT serum Ca, mM (23)                                                     | 2.2 ± 0.1     |
| KO serum Ca, mM (12)                                                     | 2.2 ± 0.0     |
| WT FE Na, % (23)                                                         | 0.62 ± 0.2    |
| KO FE Na, % (12)                                                         | 0.93 ± 0.1    |
| WT FE K, % (23)                                                          | 16.8 ± 2.2    |
| KO FE K, % (12)                                                          | 24.9 ± 4.1    |
| WT FE Ca, % (23)                                                         | 3.8 ± 0.7     |
| KO FE Ca, % (12)                                                         | 9.3 ± 2.3*    |
| WT FE urea, % (23)                                                       | 0.5 ± 0.1     |
| KO FE urea, % (12)                                                       | 0.3 ± 0.1*    |

Number of mice is stated in parentheses. Asterisks indicate statistical significance (\* $P < 0.05$ ; \*\* $P < 0.01$ ; \*\*\* $P < 0.001$  knockout vs. wild type). bw, body weight; FE, fractional excretion.
